# Supplementary material
Source: Springer Nature journal article supplement (https://www.springermedizin.de/resource/supplementary/13058_2012_3195_MOESM9_ESM.pdf/9703468)

■ Wip1 WT

■ Wip1 KO

Virgin

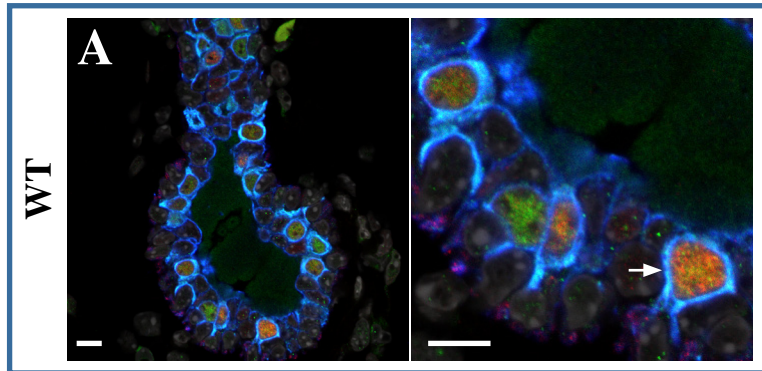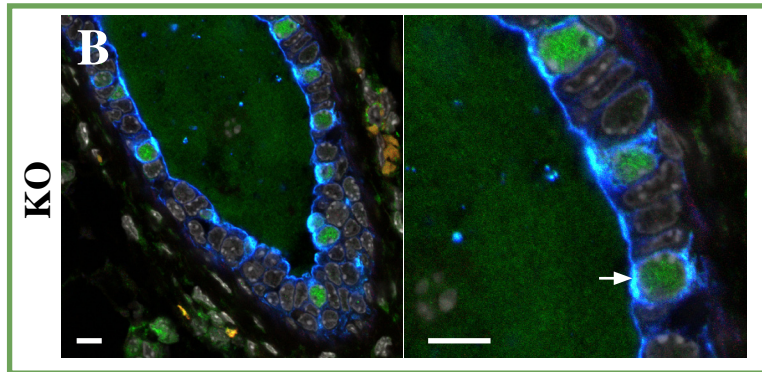

P-STAT5

ER

CK8

DAPI

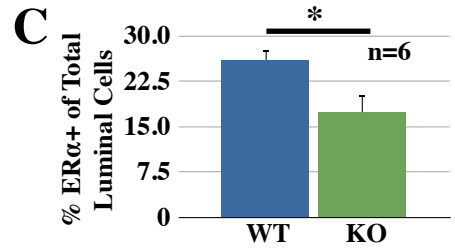

7d Pregnant

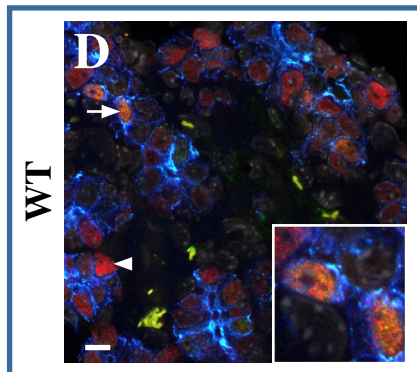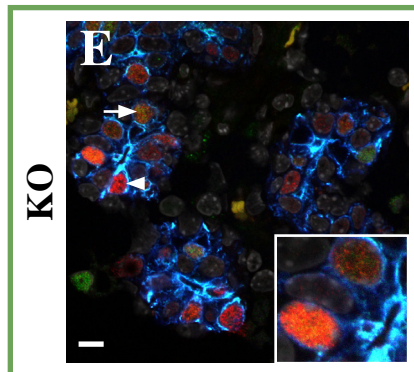

P-STAT5

ER

CK8

DAPI

Supplement: MOESM9 [file 9703468]
